# Supplementary material for: Putting the model to the test: are APC proteins essential for neuronal polarity, axon outgrowth, and axon targeting?
Source: PubMed Central journal article supplement — J Cell Biol. 2008 Oct 20;183(2):203–12. doi: 10.1083/jcb.200807079 (PMC2568018; doi:10.1083/jcb.200807079), 2008-10-20
Supplement: jcb.200807079_10.pdf [file jcb.200807079_10.pdf]

Table S1. **Neuroblast asymmetrical and persistent division**

| <b>Genotype</b>                             | <b>Asymmetrical divisions</b> | <b>Maintained division axis with daughter born next to previous daughter</b> |
|---------------------------------------------|-------------------------------|------------------------------------------------------------------------------|
| Wild-type clones                            | 100%<br>( <i>n</i> = 27)      | 100%<br>( <i>n</i> = 15)                                                     |
| <i>APC2<sup>d40</sup> APC1<sup>Q8</sup></i> | 100%<br>( <i>n</i> = 20)      | 100%<br>( <i>n</i> = 8)                                                      |
| <i>APC2<sup>g10</sup> APC1<sup>Q8</sup></i> | 100%<br>( <i>n</i> = 52)      | 100%<br>( <i>n</i> = 14)                                                     |

*n*, number of divisions analyzed.
